# Supplementary material for: The UCSC Genome Browser database: 2022 update
Source: PubMed Central journal article supplement (PMC8728131; doi:10.1093/nar/gkab959), 2021-10-28
Supplement: gkab959_supplemental_file.pdf [file gkab959_supplemental_file.pdf]

**Supplementary Table 1. Annotation tracks added or updated within the last year.**

**KEY:** N = new, U = updated, AU = automatically updated

| Track Name                                       | New / Update Status | Human Assemblies | Mouse Assemblies | Other Assemblies |
|--------------------------------------------------|---------------------|------------------|------------------|------------------|
| DECIPHER Haploinsufficiency predictions          | N                   | hg19             |                  |                  |
| gnomAD pext                                      | N                   | hg19             |                  |                  |
| hg38 Mapping                                     | N                   | hg19             |                  |                  |
| sno/miRNA                                        | U                   | hg19             |                  |                  |
| TS miRNA Targets                                 | U                   | hg19             |                  |                  |
| 1000 Genomes Trios                               | N                   | hg38             |                  |                  |
| ClinGen Composite                                | N                   | hg38             |                  |                  |
| GENCODE V36 (primary)                            | N                   | hg38             |                  |                  |
| hg19 Mapping                                     | N                   | hg38             |                  |                  |
| MANE Transcripts                                 | U                   | hg38             |                  |                  |
| CADD                                             | N                   | hg19, hg38       |                  |                  |
| ClinGen Research (formerly ISCA)                 | AU                  | hg19, hg38       |                  |                  |
| ClinVar Interpretations                          | N                   | hg19, hg38       |                  |                  |
| ClinVar Variants                                 | AU                  | hg19, hg38       |                  |                  |
| COVID GWAS v3                                    | N                   | hg19, hg38       |                  |                  |
| COVID GWAS v4                                    | N                   | hg19, hg38       |                  |                  |
| dbVar Common Struct Var                          | N, AU               | hg19, hg38       |                  |                  |
| DECIPHER CNVs and Variants                       | AU                  | hg19, hg38       |                  |                  |
| Exome Probesets                                  | N                   | hg19, hg38       |                  |                  |
| GENCODE V35/V36/V37/V38 (all)                    | N                   | hg19, hg38       |                  |                  |
| Genome In a Bottle Structural Variants and Trios | N                   | hg19, hg38       |                  |                  |
| gnomAD (v2.1.1 update / v3.1 / v3.1.1)           | N                   | hg19, hg38       |                  |                  |
| Locus Reference Genomic Sequences                | AU                  | hg19, hg38       |                  |                  |
| LOVD Variants                                    | AU                  | hg19, hg38       |                  |                  |
| Mastermind Variants                              | AU                  | hg19, hg38       |                  |                  |
| NCBI RefSeq                                      | AU                  | hg19, hg38       |                  |                  |

|                                   |       |                  |           |                            |
|-----------------------------------|-------|------------------|-----------|----------------------------|
| REVEL                             | N     | hg19, hg38       |           |                            |
| Gene Reviews                      | AU    | hg18, hg19, hg38 |           |                            |
| NHGRI Catalog of Published GWAS   | AU    | hg18, hg19, hg38 |           |                            |
| OMIM Genes & Phenotypes           | AU    | hg18, hg19, hg38 |           |                            |
| GRC Incident Database             | AU    | hg19, hg38       | mm9, mm10 | danRer10, danRer7, galGal5 |
| Conservation (35-species on mm39) | N     |                  | mm39      |                            |
| Conservation chains/nets          | N     |                  | mm39      |                            |
| GENCODE VM26/VM27 (all)           | N     |                  | mm39      |                            |
| Rhesus SNVs                       | N     |                  |           | rheMac10                   |
| Ensembl Genes v101/v104           | N     |                  |           | 47 assemblies              |
| RefSeq Diffs                      | U     |                  |           | 54 assemblies              |
| Uniprot                           | AU    |                  |           | 216 assemblies             |
| B.1.1.7 in USA                    | N     |                  |           | SARS-CoV-2                 |
| Bloom Antibody Escape             | N     |                  |           | SARS-CoV-2                 |
| Crowd-sourced User Annotations    | N, AU |                  |           | SARS-CoV-2                 |
| Human CoV                         | N     |                  |           | SARS-CoV-2                 |
| icSHAPE RNA Struct                | N     |                  |           | SARS-CoV-2                 |
| McCoy Antibody Escape             | N     |                  |           | SARS-CoV-2                 |
| Microdeletions                    | N     |                  |           | SARS-CoV-2                 |
| Natural Selection                 | N     |                  |           | SARS-CoV-2                 |
| Nextstrain Frequency              | AU    |                  |           | SARS-CoV-2                 |
| Nextstrain Parsimony              | AU    |                  |           | SARS-CoV-2                 |
| Nextstrain variants               | U     |                  |           | SARS-CoV-2                 |
| PhyloCSF                          | N, U  |                  |           | SARS-CoV-2                 |
| Phylogeny: GISAID                 | U     |                  |           | SARS-CoV-2                 |
| Phylogeny: Public                 | N, AU |                  |           | SARS-CoV-2                 |
| Pot. pathogenic indels            | N     |                  |           | SARS-CoV-2                 |
| Problematic Sites                 | U     |                  |           | SARS-CoV-2                 |
| Rappuoli Serum Escape             | N     |                  |           | SARS-CoV-2                 |
| S Protein Antibody Array          | N     |                  |           | SARS-CoV-2                 |
| Spike Mutations                   | N     |                  |           | SARS-CoV-2                 |
| Swift Primers                     | N     |                  |           | SARS-CoV-2                 |
| Uniprot                           | AU    |                  |           | SARS-CoV-2                 |

|                           |   |  |  |            |
|---------------------------|---|--|--|------------|
| Vaccines track            | N |  |  | SARS-CoV-2 |
| Variants of Concern       | N |  |  | SARS-CoV-2 |
| Weizman ORFs              | N |  |  | SARS-CoV-2 |
| Whelan 21 Antibody Escape | N |  |  | SARS-CoV-2 |
